# Supplementary material for: The Effect of Endurance Training on Pulmonary V˙O2 Kinetics in Solid Organs Transplanted Recipients
Source: MDPI journal article supplement (doi:10.3390/ijerph19159097), 2022-07-26
Supplement: s1 [file s1]

**Table S1.** Pulmonary O<sub>2</sub> uptake ( $\dot{V}O_{2p}$ ) and heart rate (HR) kinetics parameters assessed during double leg moderate constant load exercise (DL-MOD) before (PRE) the endurance training period of the heart transplant (HTx) and non-cardiac transplant recipients (kidney and liver transplanted patients).

| $\dot{V}O_{2p}$ kinetics | HTx (n = 11) | Non-cardiac transplant recipients (n = 18) | P      |
|--------------------------|--------------|--------------------------------------------|--------|
| O2 Def (mL O2)           | 804 ± 183    | 680 ± 244                                  | 0.160  |
| MRT (sec)                | 55.8 ± 15.5  | 50.4 ± 14.8                                | 0.353  |
| * SCamp (mL O2)          | 214 ± 69     | 202 ± 73                                   | 0.629  |
| HR kinetics              | HTx (n = 10) | Non-cardiac transplant recipients (n = 17) |        |
| Baseline                 | 80.1 ± 15.1  | 74.8 ± 9.3                                 | 0.267  |
| Amplitude                | 21.1 ± 6     | 25.4 ± 6.3                                 | 0.095  |
| Time delay (sec)         | 20.3 ± 15.3  | 7.5 ± 6.4                                  | 0.005  |
| Time constant (sec)      | 118.3 ± 79.5 | 42.4 ± 18.4                                | 0.001  |
| MRT (sec)                | 138.6 ± 88.1 | 49.9 ± 20.3                                | <0.001 |
| 95% CI for time constant | 87 - 112     | 36 - 49                                    | -      |

Values are expressed as mean ± standard deviation, note that  $\dot{V}O_{2p}$  slow component amplitude (SCamp) refers to double leg heavy constant load exercise. \*: HTx (n = 13); non-cardiac transplant recipients (n = 20).

**Table S2.** Pulmonary O<sub>2</sub> uptake ( $\dot{V}O_{2p}$ ) and heart rate (HR) kinetics parameters assessed during double leg moderate constant load exercise (DL-MOD) before (PRE) the endurance training period of the patients taking  $\beta$ -blockade medications and the patients not undergoing  $\beta$ -blockade therapy.

| $\dot{V}O_{2p}$ kinetics | $\beta$ -blockade (n= 12) | Not $\beta$ -blockade (n= 17) | P     |
|--------------------------|---------------------------|-------------------------------|-------|
| O2 Def (mL O2)           | 676 ± 157                 | 711 ± 240                     | 0.672 |
| MRT (sec)                | 48.1 ± 11.8               | 51.2 ± 14.3                   | 0.556 |
| * SCamp (mL O2)          | 219 ± 76                  | 197 ± 66                      | 0.370 |
| HR kinetics              | $\beta$ -blockade (n= 10) | Not $\beta$ -blockade (n= 17) | P     |
| Baseline                 | 69.7 ± 7.8                | 80.6 ± 12.3                   | 0.019 |
| Amplitude                | 21.9 ± 4.9                | 22.5 ± 7.6                    | 0.193 |
| Time delay (sec)         | 16.3 ± 16.2               | 10.3 ± 8.9                    | 0.228 |
| Time constant (sec)      | 71.2 ± 47.1               | 69.8 ± 68.7                   | 0.955 |
| MRT (sec)                | 87.5 ± 62.1               | 80.2 ± 74.1                   | 0.795 |
| 95% CI for time constant | 55 - 66                   | 55 - 76                       | -     |

Values are expressed as mean ± standard deviation, note that  $\dot{V}O_{2p}$  slow component amplitude (SCamp) refers to double leg heavy constant load exercise. \*:  $\beta$ -blockade (n = 15); Not  $\beta$ -blockade (n = 18).
